# Supplementary material for: Uninvited Guest: Arrival and Dissemination of Omicron Lineage SARS-CoV-2 in St. Petersburg, Russia
Source: MDPI journal article supplement (doi:10.3390/microorganisms10081676), 2022-08-20
Supplement: s1 [file s1]

**Table S3. Passenger information for confirmed Omicron BA.1 cases.**

| Sample number | Date of delivery to the laboratory | Date of arrival (dd.mm.yyyy) | Arrival from                                                        |
|---------------|------------------------------------|------------------------------|---------------------------------------------------------------------|
| 133           | 23.12.2021                         | n/d                          | Great Britain                                                       |
| 134           | 23.12.2021                         | n/d                          | Africa                                                              |
| 145           | 27.12.2021                         | n/d                          | Great Britain                                                       |
| 158           | 27.12.2021                         | 25.12.2021                   | Spain                                                               |
| 160           | 27.12.2021                         | 24.12.2021                   | Germany                                                             |
| 165           | 27.12.2021                         | 25.12.2021                   | Spain                                                               |
| 170           | 27.12.2021                         | n/d                          | Great Britain                                                       |
| 179           | 28.12.2021                         | 26.12.2021                   | France                                                              |
| 181           | 28.12.2021                         | 26.12.2021                   | Great Britain                                                       |
| 34            | 16.12.2021                         | 15.12.2021                   | flight from Amsterdam                                               |
| 35            | 16.12.2021                         | 15.12.2021                   | flight from Frankfurt                                               |
| 72            | 20.12.2021                         | n/d                          | Netherlands                                                         |
| 73            | 20.12.2021                         | n/d                          | England                                                             |
| 76            | 20.12.2021                         | 18.12.2021                   | Great Britain                                                       |
| 77            | 20.12.2021                         | 18.12.2021                   | United Arab Emirates (UAE)                                          |
| A26           | 10.12.2021                         | n/d                          | arrival from the UAE<br><b>first Omicron case in St. Petersburg</b> |
| C4            | 30.12.2021                         | 28.12.2021                   | Turkey                                                              |
| G2            | 30.12.2021                         | n/d                          | n/d                                                                 |
| 244           | 06.01.22                           | 04.01.2022                   | Dominican Republic                                                  |
| 247           | 06.01.22                           | n/d                          | n/d                                                                 |
| 257           | 06.01.22                           | 05.01.2022                   | Serbia                                                              |
| 262           | 08.01.22                           | 05.01.2022                   | UAE                                                                 |
| 278           | 08.01.22                           | 06.01.2022                   | Turkey                                                              |
| 280           | 08.01.22                           | n/d                          | n/d                                                                 |
| 282           | 08.01.22                           | 06.01.2022                   | Turkey                                                              |
| 288           | 08.01.22                           | 07.01.2022                   | Hungary                                                             |
| 289           | 08.01.22                           | 07.01.2022                   | Israel                                                              |
| 292           | 08.01.22                           | 06.01.2022                   | Turkey                                                              |
| 302           | 09.01.22                           | 07.01.2022                   | Dominican Republic                                                  |
| 305           | 09.01.22                           | 07.01.2022                   | Georgia                                                             |
| 306           | 09.01.22                           | 07.01.2022                   | Dominican Republic                                                  |
| 316           | 10.01.22                           | 08.01.2022                   | Poland                                                              |
| 342           | 11.01.22                           | 09.01.2022                   | Cuba                                                                |
| 348           | 11.01.22                           | 09.01.2022                   | Egypt                                                               |
| 350           | 11.01.22                           | 09.01.2022                   | Russia                                                              |
| 355           | 11.01.22                           | 09.01.2022                   | Egypt                                                               |
| 356           | 11.01.22                           | 09.01.2022                   | Russia                                                              |

|      |          |            |         |
|------|----------|------------|---------|
| 357  | 11.01.22 | 09.01.2022 | Turkey  |
| 367  | 11.01.22 | 10.01.2022 | Russia  |
| 370  | 11.01.22 | 10.01.2022 | Russia  |
| 377  | 11.01.22 | 10.01.2022 | Belarus |
| H236 | 16.01.22 | 17.01.2022 | Egypt   |
| H237 | 16.01.22 | n/d        | n/d     |
